# Supplementary material for: Capture of Type 1 Diabetes–Susceptible HLA DR-DQ Haplotypes in Japanese Subjects Using a Tag Single Nucleotide Polymorphism
Source: Oxford University Press journal article supplement (doi:10.2337/dc09-1210), 2009-10-16

**Online Appendix Table 1.** Allele and genotype distributions of rs2395185 and rs3129888 in patients with type 1 diabetes and control subjects.

| SNP       | Patients with type 1 diabetes (n=201) (%) | Control subjects (n=300) (%) | OR (95% CI)      | p       |
|-----------|-------------------------------------------|------------------------------|------------------|---------|
| rs2395185 |                                           |                              |                  |         |
| allele    |                                           |                              |                  |         |
| T         | 64.4 (259/402)                            | 38.7 (232/600)               | 2.87 (2.21–3.74) | <0.0001 |
| G         | 35.6 (143/402)                            | 61.3 (368/600)               | 1                |         |
| genotype  |                                           |                              |                  |         |
| TT        | 41.3 (83/201)                             | 13.0 (39/300)                | 9.49 (5.37–17.3) | <0.0001 |
| GT        | 46.8 (94/201)                             | 51.3 (154/300)               | 2.72 (1.65–4.62) | 0.0001  |
| GG        | 11.9 (24/201)                             | 35.7 (107/300)               | 1                |         |
| rs3129888 |                                           |                              |                  |         |
| allele    |                                           |                              |                  |         |
| G         | 7.0 (28/402)                              | 6.5 (39/600)                 | 1.08 (0.65–1.77) | 0.77    |
| A         | 93.0 (374/402)                            | 93.5 (561/600)               | 1                |         |
| genotype  |                                           |                              |                  |         |
| GG        | 0.5 (1/201)                               | 0.0 (0/300)                  |                  |         |
| AG        | 12.9 (26/201)                             | 13.0 (39/300)                | 1.00 (0.58–1.69) | 1.00    |
| AA        | 86.6 (174/201)                            | 87.0 (261/300)               | 1                |         |

The odds ratio for the GG genotype of rs3129888 was not calculated because only one patient with type 1 diabetes had this genotype.

**Online Appendix Figure 1.** Relationship between the alleles of rs2395185 and HLA DR-DQ haplotypes. This relationship was constructed based on the finding that the T allele of rs2395185 tags DRB1\*0405, which was supported by a perfect match between both homozygotes (Fig. 1A) and the report of de Bakker et al. (5).

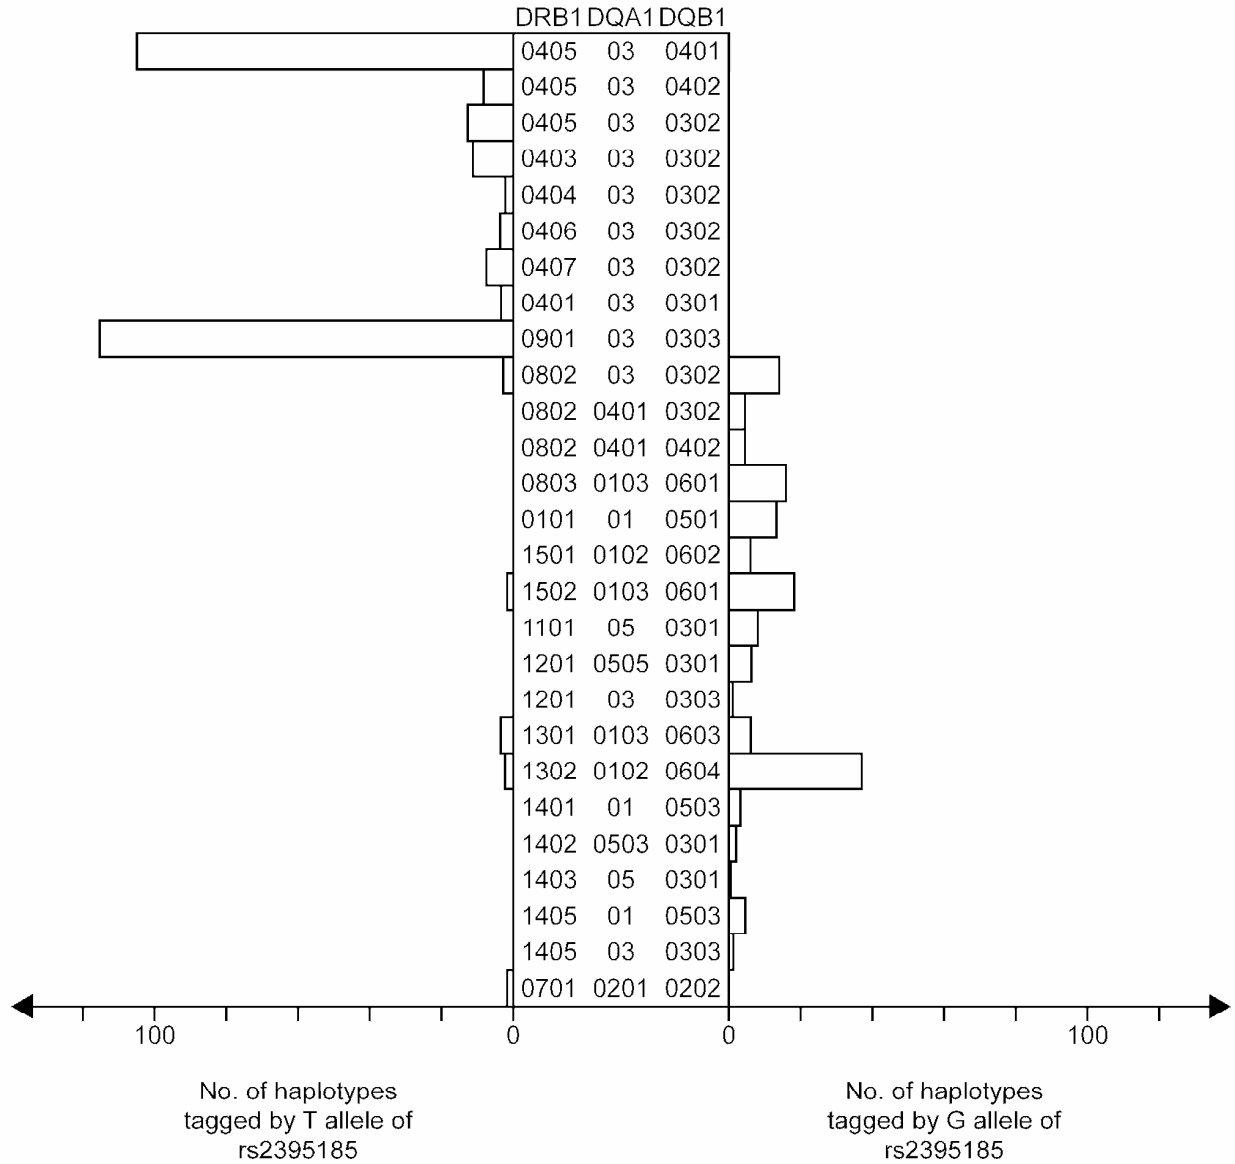

**Online Appendix Figure 2.** Relationships between genotypes of rs411326 and haplotype combinations of those involving HLA-DRB1\*0405 (0405) or not (X) (A), genotypes of rs6457617 and haplotype combinations of those involving HLA-DQA1\*03 (03) or not (X) (B), and genotypes of rs3998159 and haplotype combinations of those involving HLA-DQB1\*0303 (0303) or not (X) (C). In panel A, diagonally lined portions in the bar indicate that haplotype X (one of the X haplotypes in the case of X/X) involves DR4 or DR9, and the portions colored black in the bar indicate that the haplogenotype X/X consists of two copies of haplotypes involving DR4 or DR9. The sensitivity of the C allele of rs411326 for capturing DRB1\*0405 was 90.6% (116/128), but the specificity was 64.4% ( 87 /135). The sensitivity of the T allele of rs6457617 for capturing haplotypes involving DQA1\*03 was 98.9% (282/285), but the specificity was 64.4% (87/135). The sensitivity of rs3998159 for capturing haplotypes involving DQB1\*0303 was 99.1% (108/109), but the specificity was 17.4% (54/311).

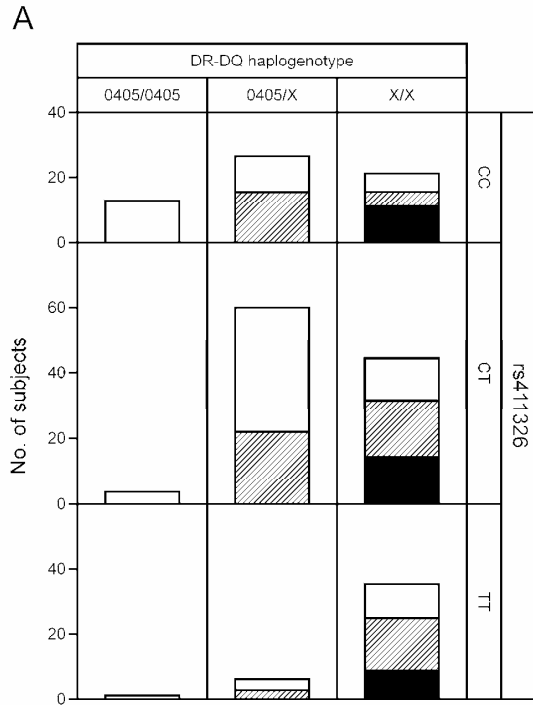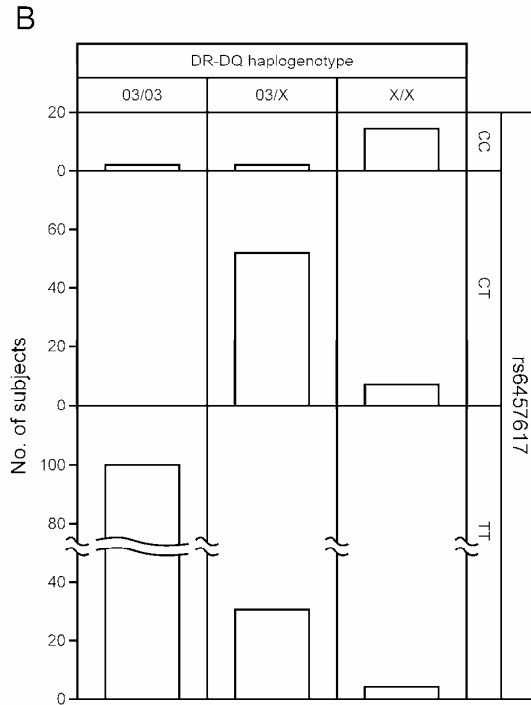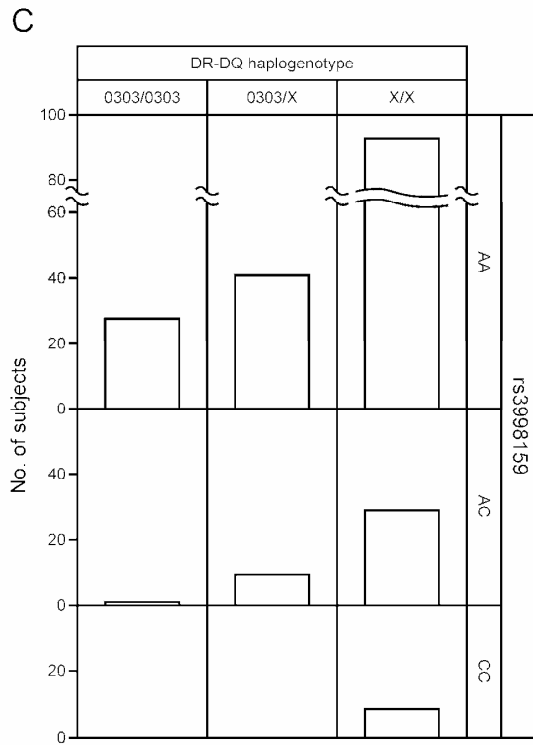

Supplement: dc09-1210_online_appendix.pdf [file dc09-1210_online_appendix.pdf]
